# Supplementary material for: SARS‐CoV‐2 infection in cats and dogs in infected mink farms
Source: PubMed Central journal article supplement — Transbound Emerg Dis. 2021 Jun 10:10.1111/tbed.14173. Online ahead of print. doi: 10.1111/tbed.14173 (PMC8242445; doi:10.1111/tbed.14173), 2021-06-10
Supplement: TBED-9999-0-s001.pdf [file TBED-9999-0-s001.pdf]

We gratefully acknowledge the following Authors from the Originating laboratories responsible for obtaining the specimens, as well as the Submitting laboratories where the genome data were generated and shared via GISAID, on which this research is based.

All Submitters of data may be contacted directly via [www.gisaid.org](http://www.gisaid.org)

Authors are sorted alphabetically.

| Accession ID                                                                                                                                                                                                                                                                                   | Originating Laboratory       | Submitting Laboratory                                    | Authors                                                                                                                                                                                                                                                                                                                                                                                                                           |                                                                                                                                                                                                                                                                                                                                                                                                                                                                          |
|------------------------------------------------------------------------------------------------------------------------------------------------------------------------------------------------------------------------------------------------------------------------------------------------|------------------------------|----------------------------------------------------------|-----------------------------------------------------------------------------------------------------------------------------------------------------------------------------------------------------------------------------------------------------------------------------------------------------------------------------------------------------------------------------------------------------------------------------------|--------------------------------------------------------------------------------------------------------------------------------------------------------------------------------------------------------------------------------------------------------------------------------------------------------------------------------------------------------------------------------------------------------------------------------------------------------------------------|
| EPI_ISL_402124                                                                                                                                                                                                                                                                                 | Wuhan Jinyintan Hospital     | Wuhan Institute of Virology, Chinese Academy of Sciences | Peng Zhou, Xing-Lou Yang, Ding-Yu Zhang, Lei Zhang, Yan Zhu, Hao-Rui Si, Zhengli Shi                                                                                                                                                                                                                                                                                                                                              |                                                                                                                                                                                                                                                                                                                                                                                                                                                                          |
| EPI_ISL_415501                                                                                                                                                                                                                                                                                 | Dutch COVID-19 response team | Erasmus Medical Center                                   | David Nieuwenhuijse, Bas Oude Munnink, Reina Sikkema, Claudia Schapendonk, Irina Chestakova, Anne van der Linden, Mark Pronk, Pascal Lexmond, Corien Swaan, Manon Haverkate, Madelief Mollers, Mart Stein, Sandra Kengne Kamga Mobou, Jeroen van Kampen, Jolanda Voermans, Aura Timen, Corine GeurtsvanKessel, Annemiek van der Eijk, Richard Molenkamp, Marion Koopmans, on behalf of the Dutch national COVID-19 response team. |                                                                                                                                                                                                                                                                                                                                                                                                                                                                          |
| EPI_ISL_422582, EPI_ISL_422724, EPI_ISL_422778, EPI_ISL_422779, EPI_ISL_422805, EPI_ISL_422834, EPI_ISL_422911, EPI_ISL_422948, EPI_ISL_455176, EPI_ISL_455188, EPI_ISL_455273, EPI_ISL_460779, EPI_ISL_460860, EPI_ISL_461057, EPI_ISL_461154, EPI_ISL_461155, EPI_ISL_523432, EPI_ISL_523516 | see above                    | Dutch COVID-19 response team                             | Erasmus Medical Center                                                                                                                                                                                                                                                                                                                                                                                                            | Bas Oude Munnink, David Nieuwenhuijse, Reina Sikkema, Claudia Schapendonk, Irina Chestakova, Anne van der Linden, Theo Bestebroer, Stefan van Nieuwkoop, Mark Pronk, Pascal Lexmond, Corien Swaan, Manon Haverkate, Madelief Mollers, Mart Stein, Sandra Kengne Kamga Mobou, Jeroen van Kampen, Jolanda Voermans, Aura Timen, Corine GeurtsvanKessel, Annemiek van der Eijk, Richard Molenkamp, Marion Koopmans, on behalf of the Dutch national COVID-19 response team. |
